# Supplementary material for: Tunable core–shell nanoparticles: macro-RAFT mediated one pot emulsion polymerization
Source: Royal Society of Chemistry journal article supplement (doi:10.1039/c3ra44722g), 2013-10-23
Supplement: c3ra44722g.pdf [file c3ra44722g.pdf]

# **Tunable Core-Shell Nanoparticles: Macro-RAFT mediated One Pot Emulsion Polymerization**

**Niranjan Yeole, S. N. Raju Kutcherlapati, Tushar Jana\***

*School of Chemistry, University of Hyderabad, Hyderabad, India.*

*E-mail: [tjscuoh@gmail.com](mailto:tjscuoh@gmail.com), [tjsc@uohyd.ernet.in](mailto:tjsc@uohyd.ernet.in)*

*Tel: (91) 40 23134808*

*Fax: (91) 40 23012460.*

**Electronic Supplementary Information**

### Gel Permeable Chromatography:

Molecular weights and polydispersity index (PDI) of colloids were determined by Gel permeable chromatography (GPC) using polystyrene standard and eluted in DMAc at flow rate of 0.5 mL/min at 25 °C on a Water Alliance GPC model (GPC, Waters 515 HPLC) fitted with Waters 2414 refractive index detector and Styragel HMW 6E DMF column.

| Sample Name | Mn     | Mw     | PDI  | Sample Name | Mn     | Mw      | PDI  |
|-------------|--------|--------|------|-------------|--------|---------|------|
| 4X          | 371872 | 845568 | 2.27 | 5X          | 269112 | 1505849 | 5.59 |
| 4Y          | 145082 | 212708 | 1.46 | 5Y          | 128930 | 772616  | 5.99 |
| 4Z          | 277637 | 698325 | 2.51 | 5Z          | 163397 | 484757  | 3.02 |

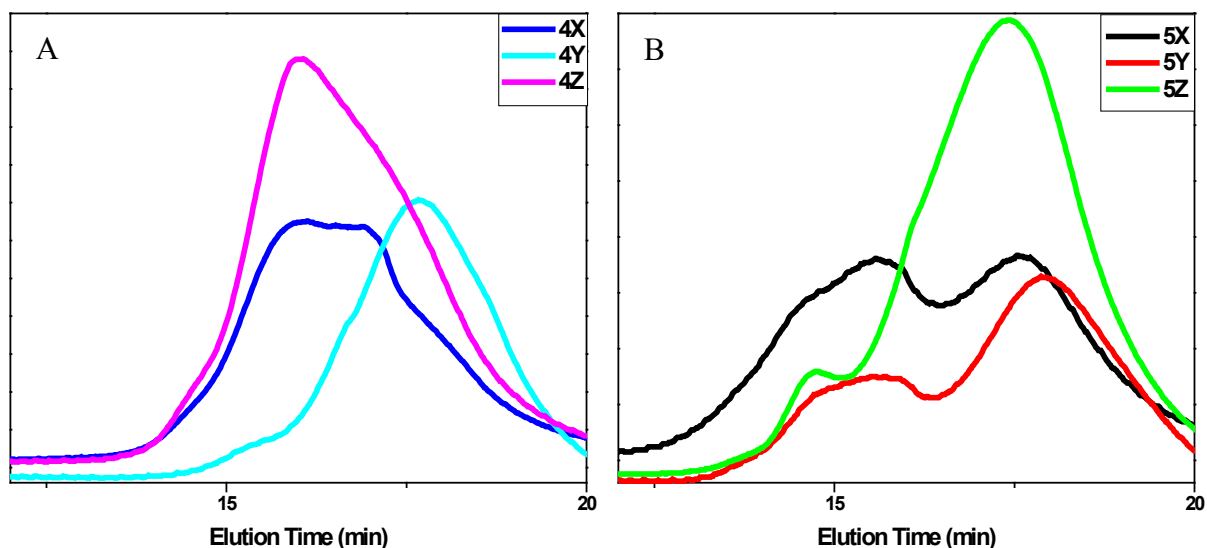

**Supporting Information Figure 1:** GPC traces of colloids 4X, 4Y, 4Z shown in [A] and 5X, 5Y, 5Z shown in [B].
